# Supplementary material for: Place of Residence Is Associated with Dietary Intake and BMI-SDS in Children and Adolescents: Findings from the DONALD Cohort Study
Source: MDPI journal article supplement (doi:10.3390/ijerph21010046), 2023-12-28
Supplement: s1 [file s1]

## Supplementary Materials

Figure S1: Choropleth maps of mean dietary intake and nutrient status indicators of Donald study participants (age 6-18) between 2014 and 2019 by city districts (Stadtbezirk) of Dortmund

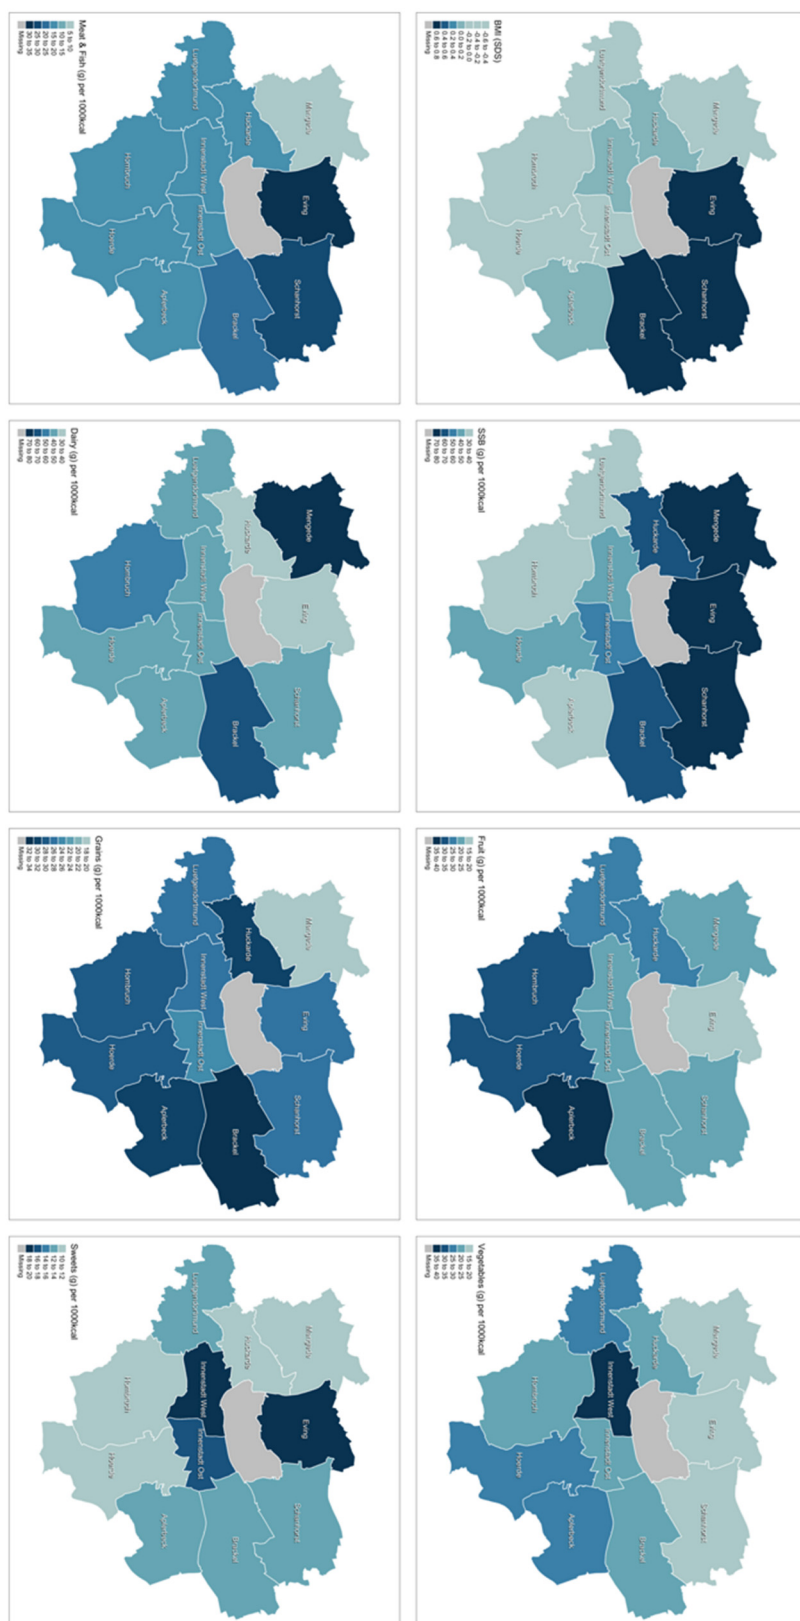

Figure S2: Predicted values for North and South Dortmund, respectively, by model specification

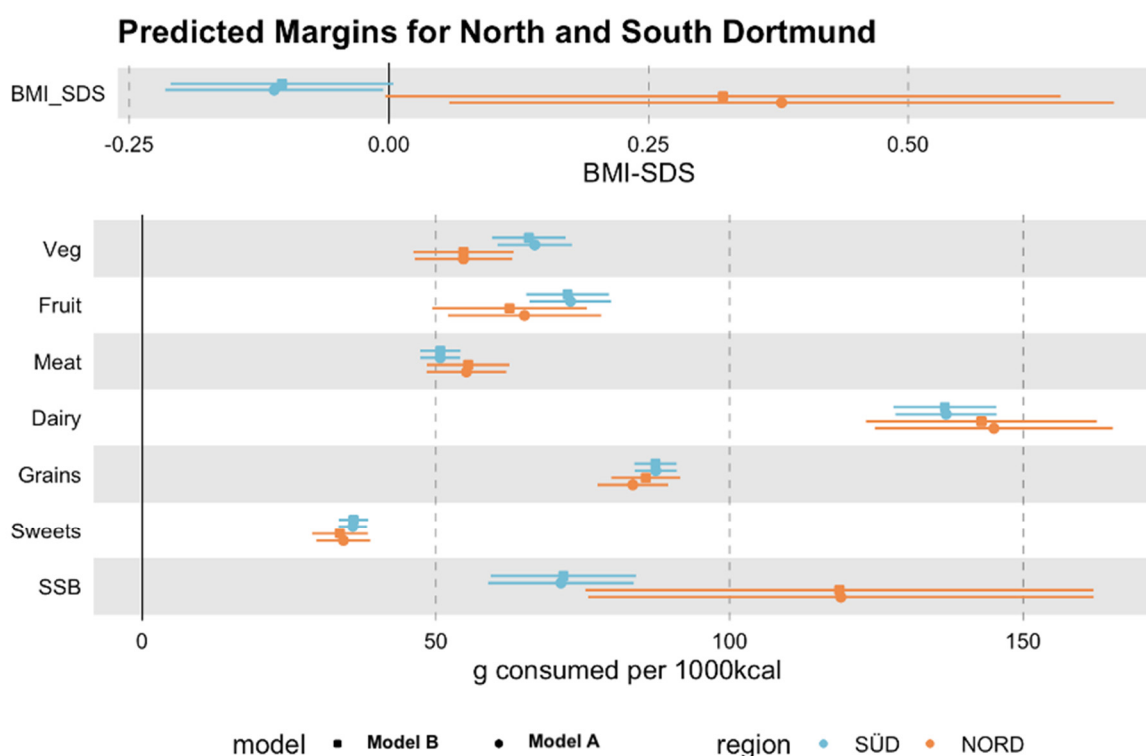

Table S1: Regression results for macronutrients by model specification

|                    |            |          | $\beta$ | p-value      | Benjamini-Hochberg p-value | Lower CI | Upper CI |
|--------------------|------------|----------|---------|--------------|----------------------------|----------|----------|
| <b>BMI</b>         | SDS        | Model A  | -0.489  | <b>0.005</b> | <b>0.005</b>               | -0.827   | -0.151   |
|                    |            | Model B  | -0.425  | <b>0.016</b> | <b>0.016</b>               | -0.769   | -0.081   |
|                    |            | Model B* | -0.417  | <b>0.017</b> | <b>0.017</b>               | -0.759   | -0.075   |
| <b>Food Groups</b> | SSB        | Model A  | -47.661 | <b>0.039</b> | <b>0.138</b>               | -92.821  | -2.501   |
|                    |            | Model B  | -47     | <b>0.044</b> | <b>0.138</b>               | -92.642  | -1.359   |
|                    | Vegetables | Model A  | 12.133  | <b>0.027</b> | <b>0.135</b>               | 1.377    | 22.889   |
|                    |            | Model B  | 11.129  | <b>0.043</b> | <b>0.138</b>               | 0.351    | 21.906   |
|                    | Fruit      | Model A  | 7.829   | 0.302        | 0.539                      | -7.03    | 22.688   |
|                    |            | Model B  | 9.876   | 0.196        | 0.490                      | -5.094   | 24.847   |
|                    | Meat       | Model A  | -4.468  | 0.252        | 0.525                      | -12.122  | 3.185    |
|                    |            | Model B  | -4.746  | 0.239        | 0.525                      | -12.64   | 3.148    |
|                    | Sweets     | Model A  | 1.602   | 0.545        | 0.706                      | -3.592   | 6.796    |
|                    |            | Model B  | 2.327   | 0.397        | 0.662                      | -3.057   | 7.712    |

|                |               |         |        |              |              |         |        |
|----------------|---------------|---------|--------|--------------|--------------|---------|--------|
| Macronutrients | Grain         | Model A | 3.905  | 0.277        | 0.533        | -3.141  | 10.952 |
|                |               | Model B | 1.646  | 0.637        | 0.758        | -5.2    | 8.492  |
|                | Dairy         | Model A | -8.138 | 0.465        | 0.706        | -29.946 | 13.671 |
|                |               | Model B | -6.237 | 0.565        | 0.706        | -27.492 | 15.017 |
|                | Protein       | Model A | -0.001 | 0.668        | 0.759        | -0.008  | 0.005  |
|                |               | Model B | -0.002 | 0.524        | 0.706        | -0.009  | 0.005  |
|                | Carbohydrates |         |        |              |              |         |        |
|                |               | Model A | -0.001 | 0.861        | 0.861        | -0.014  | 0.012  |
|                |               | Model B | -0.002 | 0.754        | 0.785        | -0.016  | 0.011  |
|                | Fat           | Model A | 0.002  | 0.723        | 0.785        | -0.011  | 0.016  |
|                |               | Model B | 0.004  | 0.558        | 0.706        | -0.01   | 0.018  |
|                | Sugar         |         |        |              |              |         |        |
|                |               | Model A | -0.02  | <b>0.021</b> | <b>0.131</b> | -0.036  | -0.003 |
|                |               | Model B | -0.016 | 0.055        | 0.153        | -0.032  | 0      |

Model A is adjusted for age and sex.

Model B is adjusted for age, sex and socio-economic status.

Model B\* (BMI-SDS only) is adjusted for age, sex, socio-economic status and physical activity.

FDR (False Discovery Rate) was calculated following Benjamini-Hochberg procedure for each model family and outcome group and set at 0.20.

*BMI* Body Mass Index, *SDS* Standard Deviation Score, *SSB* Sugar-Sweetened Beverages, *CI* Confidence Intervall, *FDR* False Discovery Rate
